# Supplementary material for: Substrate Specificity of Biofilms Proximate to Historic Shipwrecks
Source: Microorganisms. 2023 Sep 27;11(10):2416. doi: 10.3390/microorganisms11102416 (PMC10608953; doi:10.3390/microorganisms11102416)
Supplement: Supplementary file 1 [file microorganisms-11-02416-s001.zip › Mugge_MDPImicroSI_tables_supp_info.xlsx]

## Sheet: Table S1
Table S1: Biofilm Sample Metadata. Sample metadata, metagenome assembly statistics, diversity, richness, and evenness for each biofilm sample.
	B001	B005	B010	B015	B063	B066	B071	B075	M051	M053	M057	M063	M065	M072	M074	M080	M132	M135	M138	M142	M148	M150	M156	M157
Actual distance from structure	29	64	83	108	40	65	90	115	115	115	90	90	65	65	40	40	97	97	72	72	47	47	22	22
Site	Anona	Anona	Anona	Anona	15711	15711	15711	15711	15711	15711	15711	15711	15711	15711	15711	15711	15470	15470	15470	15470	15470	15470	15470	15470
Material	C1020	C1020	C1020	C1020	C1020	C1020	C1020	C1020	Pine	Oak	Pine	Oak	Pine	Oak	Pine	Oak	Pine	Oak	Pine	Oak	Pine	Oak	Pine	Oak
DNA concentration (ng/µL)	2.56	0.78	1.6	1.5	2.1	1.16	1.71	1.54	0.936	0.172	2.03	11.9	0.152	11.5	0.636	10.1	2.32	6.4	5	12.3	1.52	3.7	6.68	10.6
DNA purity (260/280)	1.5	1.48	1.47	1.49	1.53	1.5	1.48	1.53	1.4	0.69	1.49	1.83	0.26	1.81	0.29	1.77	2.14	1.99	1.86	1.96	1.9	1.94	1.71	1.99
KneadData in: raw reads forward and reverse	3494790	2629639	1986440	1217309	3501190	3492898	4394409	3507656	4069973	2518131	3850794	5053727	1280240	4733794	2366611	4106640	3478877	4988392	5500647	4915458	3886116	2628011	3893787	4978536
KneadData out: clean reads forward and reverse	2993562	2111494	1657330	997176	2936473	2861971	3568488	2915898	3571094	2230116	3372029	4511178	1117233	4228036	2071451	3687998	2910966	4451257	4906088	4390521	3196723	2309407	3501347	4452400
Percentage of reads retained by KneadData	0.8566	0.803	0.8343	0.8192	0.8387	0.8194	0.8121	0.8313	0.8774	0.8856	0.8757	0.8926	0.8727	0.8932	0.8753	0.8981	0.8368	0.8923	0.8919	0.8932	0.8226	0.8788	0.8992	0.8943
Percentage of reads removed by KneadData	0.1434	0.197	0.1657	0.1808	0.1613	0.1806	0.1879	0.1687	0.1226	0.1144	0.1243	0.1074	0.1273	0.1068	0.1247	0.1019	0.1632	0.1077	0.1081	0.1068	0.1774	0.1212	0.1008	0.1057
Number of contigs (> 500 bp)	18833	12256	9272	9682	16314	19788	28237	9260	60212	35910	58957	60383	25099	64304	35202	49134	34418	71263	89599	64438	41265	32645	53052	75032
Total length	29810214	21590005	13335316	11013458	23398484	28786696	36618983	18933035	63118397	45226874	63268246	86874333	18151107	81998964	30188472	67330349	33264491	95887736	86971275	79489478	39433988	37789431	51276916	88348233
Number of long contigs (> 1 kbp)	6235	4675	1819	2432	4254	7296	8241	3031	14657	10551	16579	19315	2707	20221	6522	15382	5956	25991	21953	19986	8821	8904	12080	19849
Number of ultra-long contigs (> 50 kbp)	33	8	17	1	45	14	28	51	19	28	0	24	0	55	0	11	10	19	7	60	1	3	0	33
Largest contig	135025	133710	163183	57705	252977	108022	185607	242599	112448	145282	37135	98484	4064	204256	12944	134953	104014	137570	147174	344524	66080	57397	49596	157690
N50	2261	3265	2203	1156	1837	1829	1394	5820	1055	1486	1124	1928	701	1415	815	1883	886	1646	965	1378	921	1250	950	1262
Mapping rate (%) from BowTie2	0.6732	0.5156	0.543	0.4344	0.6695	0.5763	0.6311	0.7001	0.4306	0.553	0.449	0.6633	0.2118	0.6503	0.2589	0.6304	0.283	0.632	0.4008	0.6044	0.3021	0.4717	0.3213	0.6123
Classified contigs (Kaiju)	15850	10118	7797	8510	12579	15106	21527	7621	41141	24790	39591	39062	14713	44172	23386	34887	20959	50545	59444	41846	28465	24891	41299	55533
Percentage of contigs classified	0.8416	0.8256	0.8409	0.879	0.7711	0.7634	0.7624	0.823	0.6833	0.6903	0.6715	0.6469	0.5862	0.6869	0.6643	0.71	0.609	0.7093	0.6634	0.6494	0.6898	0.7625	0.7785	0.7401
Shannon Diversity (Taxonomy L7)	6.05506	6.61259	5.5693	6.02895	8.47082	8.1061	8.86053	7.29434	9.3827	9.93232	9.85936	10.4626	8.99152	10.2018	10.0611	10.2398	8.83803	10.271	9.33818	9.61699	8.53439	9.3359	8.95706	9.64017
Observed Features (Richness) (Taxonomy L7)	1996	1497	971	957	2792	2892	3880	1427	6252	4913	6665	6819	3410	6794	4802	5864	4290	7051	7601	6451	4594	4502	5493	6593
Pielou's Evenness (Taxonomy L7)	0.552323	0.626913	0.561233	0.608839	0.739999	0.70501	0.743218	0.696106	0.744062	0.809982	0.776181	0.821542	0.766178	0.801394	0.8227	0.818032	0.732427	0.803453	0.724341	0.759918	0.701522	0.769251	0.720984	0.759863

## Sheet: Table S2
Table S2: Steel Biofilm T-test. Results of two-sample T-test (assuming equal variance) of Shannon diversity data from steel biofilms between Anona and Site 15711.
	Variable 1	Variable 2
Mean	6.06647	8.18295
Variance	0.18232	0.445843
Observations	4	4
Pooled Variance	0.314081
Hypothesized Mean Difference	0
df	6
t Stat	-5.3408
P(T<=t) one-tail	0.000879972
t Critical one-tail	1.94318
P(T<=t) two-tail	*0.002
t Critical two-tail	2.44691
*Denotes statistical significance

## Sheet: Table S3
Table S3: Pine Biofilm T-test. Results of two-sample T-test (assuming equal variance) of Shannon diversity data from pine biofilms between Site 15711 and Site 15470.
	Variable 1	Variable 2
Mean	9.57368	8.91691
Variance	0.23154	0.110541
Observations	4	4
Pooled Variance	0.171041
Hypothesized Mean Difference	0
df	6
t Stat	2.24583
P(T<=t) one-tail	0.0329087
t Critical one-tail	1.94318
P(T<=t) two-tail	0.0658174
t Critical two-tail	2.44691

## Sheet: Table S4
Table S4: Oak Biofilm T-test. Results of two-sample T-test (assuming equal variance) of Shannon diversity data from oak biofilms between Site 15711 and Site 15470.
	Variable 1	Variable 2
Mean	10.2091	9.71602
Variance	0.0472925	0.156029
Observations	4	4
Pooled Variance	0.101661
Hypothesized Mean Difference	0
df	6
t Stat	2.1872
P(T<=t) one-tail	0.0356748
t Critical one-tail	1.94318
P(T<=t) two-tail	0.0713497
t Critical two-tail	2.44691

## Sheet: Table S5
Table S5: Full Model PERMANOVA. Results from permutational analysis of variance (PERMANOVA) main test full models on taxonomy, biofilm formation genes, and chemolithotrophic metabolism genes categorized by element. Tests were run using distance from structure in meters as a covariate, Type I (sequential) sum of squares, fixed effects sum to zero for mixed terms, permutation of residuals under a r…
PERMANOVA Main Test Full Model	Taxonomy (Species level)	Wsp (Biofilm formation)	Arsenic	C1 Compounds	Carbon	Hydrogen	Iron	Manganese	Nitrogen	Oxygen	Sulfur	Urea
Distance	0.082	*0.009	0.618	0.768	0.636	0.379	0.18	0.567	0.909	0.578	0.461	0.426
Substrate	*0.001	*0.001	*0.001	*0.001	*0.001	*0.001	*0.001	*0.004	*0.001	*0.001	*0.001	*0.004
Site	*0.001	0.079	*0.003	*0.015	0.057	0.11	*0.004	*0.004	0.398	0.217	*0.001	*0.001
Distance x Substrate	0.356	*0.008	0.206	0.976	0.8	0.658	0.467	0.268	0.913	0.855	0.546	0.39
Distance x Site	0.307	0.353	0.295	0.184	0.988	0.341	0.552	0.154	0.75	0.473	0.339	0.106
Substrate x Site**	*0.031	0.093	*0.008	0.461	0.389	0.448	0.775	0.567	0.295	0.127	0.433	*0.035
** Term has one or more empty cells
*Denotes statistical significance

## Sheet: Table S6
Table S6: Reduced Model PERMANOVA. Results from permutational analysis of variance (PERMANOVA) main test reduced models on taxonomy, biofilm formation genes, and chemolithotrophic metabolism genes categorized by element. Tests were run using distance from structure in meters as a covariate, fixed effects sum to zero for mixed terms, permutation of residuals under a reduced model, and 999 permutat…
PERMANOVA Main Test Reduced Model	Taxonomy (Species level)	Wsp (Biofilm formation)	Arsenic	C1 Compounds	Carbon	Hydrogen	Iron	Manganese	Nitrogen	Oxygen	Sulfur	Urea
Distance	*0.031	*0.004	NT	NT	NT	NT	0.13	NT	NT	NT	NT	NT
Substrate	*0.001	*0.001	*0.001	*0.001	*0.001	*0.001	*0.001	*0.002	NT	*0.001	*0.001	*0.001
Site	*0.001	0.107	*0.009	0.066	*0.01	0.063	*0.002	0.315	NT	0.148	*0.002	*0.001
Distance x Substrate	NT	*0.013	0.166	NT	NT	NT	NT	NT	NT	NT	NT	NT
Distance x Site	NT	NT	NT	0.197	NT	NT	NT	0.113	NT	NT	NT	0.072
Substrate x Site**	*0.003	0.085	*0.004	NT	NT	NT	NT	NT	NT	0.094	NT	0.088
** Term has one or more empty cells
*Denotes statistical significance

## Sheet: Table S7
Table S7: 'Substrate x Site' Pairwise Tests. PERMANOVA pairwise tests on the interaction term 'substrate x site' using a reduced model. Model was run using Type I (sequential) sum of squares, fixed effects sum to zero for mixed terms, permutation of residuals under a reduced model, and 999 permutations.
PERMANOVA Pairwise Tests Reduced Model	Anona, Site 15711 (Steel Substrates)	Site 15711, Site 15470 (Pine Substrates)	Site 15711, Site 15470 (Oak Substrates)
Substrate x Site	*0.035	*0.014	*0.026
*Denotes statistical significance

## Sheet: Table S8
Table S8: Metagenomic Taxonomy of Steel Biofilms recovered near Anona. Taxa are annotated to the species level and exclude taxa composing <1% of whole community within each sample.
Taxon Name	29m	64m	83m	108m
Bacteria; Proteobacteria; Gammaproteobacteria; unclassified Gammaproteobacteria; Gammaproteobacteria bacterium;	0.1843	0.0549	0.1729	0.1375
Bacteria; Proteobacteria; delta/epsilon subdivisions; Epsilonproteobacteria; Campylobacterales; Campylobacteraceae; Arcobacter group; Arcobacter; unclassified Arcobacter; Arcobacter sp.;	0.0841	0.0705	0.1695	0.0163
Bacteria; Proteobacteria; delta/epsilon subdivisions; Epsilonproteobacteria; Campylobacterales; Thiovulaceae; Sulfurimonas; unclassified Sulfurimonas; Sulfurimonas sp.;	0.075	0.1057	0.0496	0.1019
Bacteria; Proteobacteria; Gammaproteobacteria; Gammaproteobacteria incertae sedis; sulfur-oxidizing symbionts; endosymbiont of Galathealinum brachiosum;	0.0669	0	0	0
Bacteria; Proteobacteria; Alphaproteobacteria; Rhizobiales; unclassified Rhizobiales; Rhizobiales bacterium;	0.0415	0.0118	0	0
Bacteria; Proteobacteria; unclassified Proteobacteria; Proteobacteria bacterium;	0.023	0.0414	0.0139	0.0223
Bacteria; Proteobacteria; Zetaproteobacteria; Ghiorsea; Ghiorsea bivora;	0	0.0737	0.0201	0.0622
Bacteria; Proteobacteria; Zetaproteobacteria; unclassified Zetaproteobacteria; Zetaproteobacteria bacterium CG2_30_46_52;	0	0.0271	0	0
Bacteria; Proteobacteria; Zetaproteobacteria; unclassified Zetaproteobacteria; Zetaproteobacteria bacterium;	0	0.0219	0	0.0384
Bacteria; Proteobacteria; Alphaproteobacteria; Rhodobacterales; Rhodobacteraceae; Sulfitobacter; Sulfitobacter mediterraneus;	0	0.0138	0	0
Bacteria; Proteobacteria; delta/epsilon subdivisions; Epsilonproteobacteria; Campylobacterales; Thiovulaceae; Sulfurimonas; Sulfurimonas gotlandica;	0	0	0.0112	0
Bacteria; Proteobacteria; Gammaproteobacteria; Thiotrichales; Thiotrichaceae; unclassified Thiotrichaceae; Thiotrichaceae bacterium;	0	0	0	0.0554

## Sheet: Table S9
Table S9: Metagenomic Taxonomy of Steel, Pine, and Oak biofilms recovered near Site 15711. Taxa are annotated to the species level and exclude taxa composing <1% of whole community within each sample.
Taxon Name	Steel 40m	Steel 65m	Steel 90m	Steel 115m	Pine 40m	Pine 65m	Pine 90m	Pine 115m	Oak 40m	Oak 65m	Oak 90m	Oak 115m
Bacteria; Proteobacteria; Gammaproteobacteria; unclassified Gammaproteobacteria; Gammaproteobacteria bacterium;	0.089	0.0504	0.05	0.0718	0	0.0123	0.0183	0	0	0.0134	0.0118	0.0129
Bacteria; Proteobacteria; delta/epsilon subdivisions; Epsilonproteobacteria; Campylobacterales; Thiovulaceae; Sulfurimonas; unclassified Sulfurimonas; Sulfurimonas sp.;	0.0507	0.063	0.0283	0.0742	0	0	0	0	0	0	0	0
Bacteria; Proteobacteria; Gammaproteobacteria; Oceanospirillales; Kangiellaceae; Kangiella; unclassified Kangiella; Kangiella sp.;	0.0322	0.0104	0.0144	0.0553	0	0	0	0	0	0	0	0
Bacteria; FCB group; Bacteroidetes/Chlorobi group; Bacteroidetes; unclassified Bacteroidetes; Bacteroidetes bacterium;	0.0251	0	0	0	0.0106	0.0116	0	0.0116	0	0	0	0.0101
Bacteria; Proteobacteria; unclassified Proteobacteria; Proteobacteria bacterium;	0.0164	0.0679	0	0.0308	0	0	0	0	0	0	0.01	0
Bacteria; Proteobacteria; Alphaproteobacteria; Rhizobiales; unclassified Rhizobiales; Rhizobiales bacterium;	0	0.0156	0	0	0.0332	0.0485	0.0547	0.0785	0	0	0.0125	0
Bacteria; Proteobacteria; Betaproteobacteria; Nitrosomonadales; Methylophilaceae; unclassified Methylophilaceae; Methylophilaceae bacterium;	0	0	0	0	0.017	0.0229	0	0.0314	0.0187	0	0	0.0281
Bacteria; Proteobacteria; Gammaproteobacteria; Gammaproteobacteria incertae sedis; SAR86 cluster; SAR86 cluster bacterium;	0	0	0	0	0	0	0.0128	0	0.0109	0.0149	0.0183	0.0194
Bacteria; Proteobacteria; delta/epsilon subdivisions; Epsilonproteobacteria; Campylobacterales; Campylobacteraceae; Arcobacter group; Arcobacter; unclassified Arcobacter; Arcobacter sp.;	0	0	0.0551	0	0	0	0	0	0	0	0	0
Bacteria; Proteobacteria; Gammaproteobacteria; Thiotrichales; Thiotrichaceae; Cocleimonas; Cocleimonas flava;	0	0.0441	0	0	0	0	0	0	0	0	0	0
Bacteria; FCB group; Bacteroidetes/Chlorobi group; Bacteroidetes; Flavobacteriia; Flavobacteriales; Flavobacteriaceae; unclassified Flavobacteriaceae; Flavobacteriaceae bacterium;	0	0	0	0	0.0101	0	0	0.011	0	0	0	0.0165
Bacteria; Proteobacteria; Alphaproteobacteria; Rhodobacterales; Rhodobacteraceae; Sulfitobacter; Sulfitobacter mediterraneus;	0	0	0.0217	0.0135	0	0	0	0	0	0	0	0
Bacteria; Proteobacteria; Zetaproteobacteria; Mariprofundales; Mariprofundaceae; Mariprofundus; Mariprofundus micogutta;	0	0	0	0.0347	0	0	0	0	0	0	0	0
Bacteria; PVC group; Verrucomicrobia; Verrucomicrobiae; unclassified Verrucomicrobiae; Verrucomicrobiae bacterium DG1235;	0	0	0	0	0	0.017	0.0121	0	0	0	0	0
Bacteria; Proteobacteria; Alphaproteobacteria; Maricaulales; Robiginitomaculaceae; Robiginitomaculum; unclassified Robiginitomaculum; Robiginitomaculum sp.;	0	0	0	0	0	0	0	0	0	0.0236	0	0
Bacteria; Proteobacteria; Alphaproteobacteria; Rhodobacterales; Rhodobacteraceae; Amylibacter; unclassified Amylibacter; Amylibacter sp. SFDW26;	0	0	0.023	0	0	0	0	0	0	0	0	0
Bacteria; Proteobacteria; Gammaproteobacteria; Oceanospirillales; Alcanivoracaceae; Marinicella; Marinicella litoralis;	0	0	0	0	0	0	0	0	0.0204	0	0	0
Bacteria; FCB group; Bacteroidetes/Chlorobi group; Bacteroidetes; Flavobacteriia; Flavobacteriales; unclassified Flavobacteriales; Flavobacteriales bacterium;	0	0	0	0	0	0	0	0	0	0.0183	0	0
Bacteria; Proteobacteria; Zetaproteobacteria; unclassified Zetaproteobacteria; Zetaproteobacteria bacterium CG1_02_53_45;	0	0	0	0.0174	0	0	0	0	0	0	0	0
Bacteria; Proteobacteria; Zetaproteobacteria; unclassified Zetaproteobacteria; Zetaproteobacteria bacterium CG_4_9_14_3_um_filter_53_7;	0	0	0	0.0137	0	0	0	0	0	0	0	0
Bacteria; Proteobacteria; delta/epsilon subdivisions; Epsilonproteobacteria; Campylobacterales; Thiovulaceae; Sulfurimonas; Sulfurimonas gotlandica;	0	0.0128	0	0	0	0	0	0	0	0	0	0
Bacteria; Proteobacteria; Gammaproteobacteria; Oceanospirillales; Alcanivoracaceae; Marinicella; Marinicella sediminis;	0	0	0	0	0	0	0	0	0.0119	0	0	0
Bacteria; Proteobacteria; delta/epsilon subdivisions; Deltaproteobacteria; Myxococcales; Sorangiineae; unclassified Sorangiineae; Sorangiineae bacterium NIC37A_2;	0	0	0	0	0	0	0	0	0	0	0.0114	0
Bacteria; Proteobacteria; Zetaproteobacteria; Mariprofundales; Mariprofundaceae; Mariprofundus; Mariprofundus aestuarium;	0	0	0	0.0108	0	0	0	0	0	0	0	0
Bacteria; PVC group; Verrucomicrobia; Opitutae; Puniceicoccales; Puniceicoccaceae; Pelagicoccus; Pelagicoccus mobilis;	0	0	0	0	0	0.0103	0	0	0	0	0	0
Bacteria; Proteobacteria; Alphaproteobacteria; Rhodobacterales; Rhodobacteraceae; unclassified Rhodobacteraceae; Rhodobacteraceae bacterium;	0	0	0	0	0.01	0	0	0	0	0	0	0

## Sheet: Table S10
Table S10: Metagenomic Taxonomy of Pine and Oak Biofilms recovered near Site 15470. Taxa are annotated to the species level and exclude taxa composing <1% of whole community within each sample.
Taxon Name	Pine 22m	Pine 47m	Pine 72m	Pine 97m	Oak 22m	Oak 47m	Oak 72m	Oak 97m
Bacteria; Proteobacteria; Alphaproteobacteria; Rhizobiales; unclassified Rhizobiales; Rhizobiales bacterium;	0.1044	0.0684	0.0496	0.0455	0.0367	0	0.0235	0.0107
Bacteria; FCB group; Bacteroidetes/Chlorobi group; Bacteroidetes; Flavobacteriia; Flavobacteriales; Flavobacteriaceae; unclassified Flavobacteriaceae; Flavobacteriaceae bacterium;	0.0366	0.0464	0.0378	0.0424	0	0	0	0
Bacteria; Proteobacteria; Gammaproteobacteria; Gammaproteobacteria incertae sedis; SAR86 cluster; SAR86 cluster bacterium;	0.0315	0.023	0.0116	0.0215	0	0.0138	0.0144	0.0145
Bacteria; PVC group; Verrucomicrobia; Verrucomicrobiae; unclassified Verrucomicrobiae; Verrucomicrobiae bacterium DG1235;	0.0133	0.0277	0.016	0.0204	0	0	0	0
Bacteria; FCB group; Bacteroidetes/Chlorobi group; Bacteroidetes; Flavobacteriia; Flavobacteriales; Flavobacteriaceae; Maribacter; unclassified Maribacter; Maribacter sp. RZ26;	0.012	0	0	0	0	0	0	0
Bacteria; Proteobacteria; Betaproteobacteria; Nitrosomonadales; Methylophilaceae; unclassified Methylophilaceae; Methylophilaceae bacterium;	0.0103	0	0	0.013	0.0142	0.0327	0	0
Bacteria; PVC group; Verrucomicrobia; Opitutae; Puniceicoccales; Puniceicoccaceae; Pelagicoccus; unclassified Pelagicoccus; Pelagicoccus sp. NFK12;	0	0.0156	0	0.0121	0	0	0	0
Bacteria; PVC group; Verrucomicrobia; Opitutae; Puniceicoccales; Puniceicoccaceae; Pelagicoccus; Pelagicoccus mobilis;	0	0.0153	0	0.0115	0	0	0	0
Bacteria; PVC group; Planctomycetes; unclassified Planctomycetes; Planctomycetes bacterium Poly30;	0	0	0	0	0.0279	0	0.0314	0
Bacteria; Proteobacteria; Gammaproteobacteria; unclassified Gammaproteobacteria; Gammaproteobacteria bacterium;	0	0	0	0	0.014	0.0168	0.0111	0.0144
Bacteria; Proteobacteria; Alphaproteobacteria; Rhodobacterales; unclassified Rhodobacterales; Rhodobacterales bacterium 56_14_T64;	0	0	0	0	0	0.0488	0	0
Bacteria; Proteobacteria; Gammaproteobacteria; Oceanospirillales; Oceanospirillaceae; unclassified Oceanospirillaceae; Osedax symbiont Rs1;	0	0	0	0	0.0123	0.0254	0	0.0107
Bacteria; FCB group; Bacteroidetes/Chlorobi group; Bacteroidetes; Saprospiria; Saprospirales; Lewinellaceae; Lewinella; Lewinella persica;	0	0	0.0148	0	0.0129	0	0	0
Bacteria; Proteobacteria; Gammaproteobacteria; Alteromonadales; Colwelliaceae; Colwellia; unclassified Colwellia; Colwellia sp. 39_35_sub15_T18;	0	0	0	0	0	0	0.0125	0.0114
Bacteria; Proteobacteria; Gammaproteobacteria; Chromatiales; Granulosicoccaceae; Granulosicoccus; Granulosicoccus antarcticus;	0	0	0	0	0.0232	0	0	0
Bacteria; Proteobacteria; Alphaproteobacteria; Rhodobacterales; Rhodobacteraceae; unclassified Rhodobacteraceae; Rhodobacteraceae bacterium;	0	0	0	0	0	0.0187	0	0
Bacteria; unclassified Bacteria; 'Osedax' symbiont bacterium Rs2_46_30_T18;	0	0	0	0	0	0.0159	0	0
Bacteria; Proteobacteria; Alphaproteobacteria; unclassified Alphaproteobacteria; Alphaproteobacteria bacterium;	0	0	0	0	0	0	0.0128	0
Bacteria; Proteobacteria; delta/epsilon subdivisions; Deltaproteobacteria; unclassified Deltaproteobacteria; Deltaproteobacteria bacterium;	0	0	0	0	0	0	0.0118	0
Bacteria; Proteobacteria; Gammaproteobacteria; Oceanospirillales; Oceanospirillaceae; unclassified Oceanospirillaceae; Osedax symbiont Rs2;	0	0	0	0	0	0.0117	0	0
Bacteria; FCB group; Bacteroidetes/Chlorobi group; Bacteroidetes; unclassified Bacteroidetes; Bacteroidetes bacterium;	0	0	0.011	0	0	0	0	0
Bacteria; PVC group; Verrucomicrobia; Opitutae; Puniceicoccales; Puniceicoccaceae; Pelagicoccus; Pelagicoccus albus;	0	0.0103	0	0	0	0	0	0

[truncated: 2 more sheets: Table S11, Table S12]
